# Supplementary material
Source: Springer Nature journal article supplement (https://www.springermedizin.de/resource/supplementary/12933_2004_25_MOESM7_ESM.pdf/9539438)
Supplement: MOESM7 [file 9539438]

# ARTERIOGENESIS IMPAIRED BY DM. “REMODELING COLLATERALIZATION” IMPAIRED BY DM. DUE TO

^ PAI-1

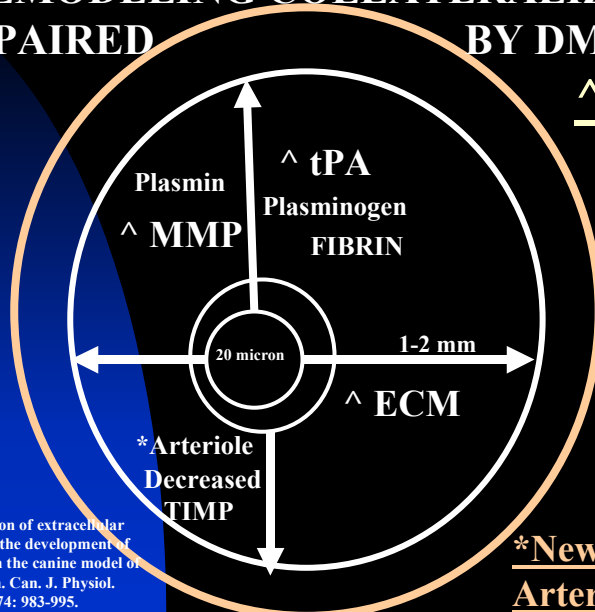

Pressure  
Gradient  
from  
unoccluded  
to occluded  
arterial  
vessel.

Tyagi SC,  
Parker JL  
Temporal expression of extracellular  
MMPs and tPA in the development of  
collateral vessels in the canine model of  
coronary occlusion. Can. J. Physiol.  
Pharmacol. 1996; 74: 983-995.

\*Newly Remodeled  
Arteriole
